# Supplementary material
Source: PubMed Central journal article supplement (PMC2980747)
Supplement: mmc1.pdf [file mmc1.pdf]

**Biophysical Journal, Volume 99**

**Supporting Material**

**Combined and Independent Action of Proteins SP-B and SP-C  
in the Surface Behavior and Mechanical Stability of Pulmonary  
Surfactant Films**

David Schürch, Olga L. Ospina, Antonio Cruz, and Jesús Pérez-Gil

Supplementary Table 1:

Influence of SP-B and SP-C on surface activity

| Sample                           | Protein (%) | Adsorption        |        |                        |        | Quasi static cycles       |                     |                           | Dynamic cycles            |                     |                           |
|----------------------------------|-------------|-------------------|--------|------------------------|--------|---------------------------|---------------------|---------------------------|---------------------------|---------------------|---------------------------|
|                                  |             | $\gamma_i$ (mN/m) |        | $\gamma_{post}$ (mN/m) |        | $\gamma_{min}$ QS4 (mN/m) | Area change QS4 (%) | $\gamma_{max}$ QS4 (mN/m) | $\gamma_{min}$ D20 (mN/m) | Area change D20 (%) | $\gamma_{max}$ D20 (mN/m) |
|                                  |             | 20s               | 5min   | 20s                    | 5min   |                           |                     |                           |                           |                     |                           |
| Lipid extract (protein depleted) | 0           | 55 ± 2            | 50 ± 1 | 52 ± 2                 | 45 ± 5 | 2.3 ± 0.8                 | 52.3 ± 4.6          | 52.3 ± 1.6                | 2.6 ± 0.3                 | 34.7 ± 5.5          | 56.6 ± 3.5                |
| Lipid extract + SP-B             | 0,4         | 33 ± 4            | 24 ± 1 | 45 ± 2                 | 25 ± 1 | 1.6 ± 0.1                 | 18.8 ± 1.4          | 31.4 ± 1.4                | 2.1 ± 0.3                 | 14.8 ± 2.8          | 32.7 ± 2.3                |
|                                  | 1,0         | 25 ± 1            | 25 ± 1 | 24 ± 1                 | 24 ± 1 | 1.6 ± 0.2                 | 21.0 ± 3.8          | 30.4 ± 1.2                | 1.9 ± 0.3                 | 18.5 ± 2.1          | 32.2 ± 2.4                |
|                                  | 1,2         | 24 ± 1            | 24 ± 1 | 24 ± 1                 | 24 ± 1 | 1.8 ± 0.1                 | 18.5 ± 2.4          | 28.2 ± 0.1                | 1.8 ± 0.2                 | 19.3 ± 1.8          | 31.7 ± 1.4                |
| Lipid extract + SP-C             | 0,6         | 33 ± 1            | 31 ± 1 | 42 ± 5                 | 30 ± 4 | 2.2 ± 0.3                 | 32.5 ± 6.8          | 32.2 ± 1.7                | 2.4 ± 0.5                 | 19.0 ± 2.9          | 36.6 ± 4.8                |
|                                  | 1,0         | 34 ± 1            | 30 ± 1 | 31 ± 3                 | 28 ± 2 | 2.1 ± 0.2                 | 25.7 ± 3.3          | 31.5 ± 2.1                | 2.2 ± 0.6                 | 20.1 ± 1.2          | 34.5 ± 2.1                |
|                                  | 1,2         | 37 ± 1            | 30 ± 1 | 30 ± 2                 | 27 ± 1 | 2.3 ± 0.3                 | 27.7 ± 2.8          | 30.0 ± 0.4                | 2.3 ± 0.2                 | 20.3 ± 0.7          | 33.5 ± 0.2                |
|                                  | 1,6         | 35 ± 4            | 29 ± 2 | 29 ± 4                 | 28 ± 1 | 2.4 ± 0.3                 | 29.7 ± 1.4          | 29.4 ± 1.3                | 2.2 ± 0.1                 | 18.1 ± 1.2          | 31.9 ± 0.5                |
| Lipid extract + SP-B + SP-C      | 0,4, 0,6    | 32 ± 2            | 22 ± 1 | 24 ± 1                 | 23 ± 1 | 1.6 ± 0.2                 | 21.3 ± 3.4          | 29.9 ± 2.5                | 2.1 ± 0.5                 | 18.7 ± 2.9          | 34.7 ± 0.5                |
|                                  | 1,2, 1,2    | 34 ± 4            | 24 ± 1 | 24 ± 1                 | 23 ± 1 | 2.0 ± 0.3                 | 28.3 ± 2.4          | 27.1 ± 2.6                | 2.3 ± 0.2                 | 18.5 ± 3.9          | 34.5 ± 1.0                |
|                                  | 1,2, 1,6    | 28 ± 2            | 23 ± 1 | 24 ± 1                 | 23 ± 2 | 2.1 ± 0.3                 | 30.3 ± 3.4          | 29.6 ± 0.4                | 2.1 ± 0.3                 | 22.1 ± 2.9          | 32.1 ± 1.0                |
| Native surfactant                | NA          | 23 ± 1            | 22 ± 1 | 24 ± 1                 | 24 ± 1 | 1.3 ± 0.1                 | 14.0 ± 1.1          | 26.5 ± 0.8                | 1.5 ± 0.3                 | 14.4 ± 1.7          | 26.3 ± 0.9                |
| Organic extract                  | NA          | 24 ± 1            | 23 ± 1 | 26 ± 1                 | 25 ± 1 | 1.4 ± 0.2                 | 17.3 ± 2.8          | 28.7 ± 2.0                | 1.5 ± 0.2                 | 15.5 ± 1.6          | 29.9 ± 2.5                |
| Organic extract (reassembled)    | NA          | 27 ± 1            | 25 ± 1 | 27 ± 1                 | 25 ± 1 | 1.4 ± 0.2                 | 16.1 ± 1.3          | 27.2 ± 1.6                | 1.6 ± 0.4                 | 15.2 ± 1.1          | 28.5 ± 2.8                |

Protein (%): protein content % with respect to phospholipids (w/w)

$\gamma_i$  (mN/m): surface tension 20 seconds and 5 minutes after surfactant contact with air-liquid interface (initial film formation)

$\gamma_{post}$  (mN/m): surface tension 20 seconds and 5 minutes after rapid film expansion

$\gamma_{min}$  QS4 (mN/m): minimum surface tension at 4<sup>th</sup> quasi-static compression

Area change QS4 (%): area change of film from fully expanded state (100% area) to achieve minimal surface tension (4<sup>th</sup> quasi-static cycle)

$\gamma_{max}$  QS4 (mN/m): maximum surface tension at the end of the 4<sup>th</sup> quasi-static compression-expansion cycle.

$\gamma_{min}$  D20 (mN/m): minimum surface tension at 20<sup>th</sup> dynamic compression

Area change D20 (%): area change of film from fully expanded state (100% area) to achieve minimal surface tension (20<sup>th</sup> dynamic cycle)

$\gamma_{max}$  D20 (mN/m): maximum surface tension at the end of the 20<sup>th</sup> dynamic compression-expansion cycle

Supplementary Table 2:

Influence of SP-B and SP-C on surfactant film stability

| Sample                           | Protein concentration | $\gamma_{\min \text{ QS1}}$ (mN/m) | $\Delta \gamma_{\text{QS1}}$ (mN/m) | $\gamma_{\min \text{ post}}$ (mN/m) | $\Delta \gamma_{\text{post}}$   |
|----------------------------------|-----------------------|------------------------------------|-------------------------------------|-------------------------------------|---------------------------------|
| Lipid extract (protein depleted) | <b>0</b>              | $2.3 \pm 0.8$                      | <b><math>4.8 \pm 4</math></b>       | $2.1 \pm 0.2$                       | <b><math>1.9 \pm 0.3</math></b> |
| Lipid extract + SP-B             | <b>0.4</b>            | $1.7 \pm 0.1$                      | <b><math>2.4 \pm 0.3</math></b>     | $1.7 \pm 0.1$                       | <b><math>1.6 \pm 0.2</math></b> |
|                                  | 1.0                   |                                    |                                     | $1.6 \pm 0.2$                       | $1.5 \pm 0.1$                   |
|                                  | 1.2                   |                                    |                                     | $1.8 \pm 0.2$                       | $1.5 \pm 0.1$                   |
| Lipid extract + SP-C             | <b>0.6</b>            | $2.3 \pm 0.3$                      | <b><math>4.5 \pm 0.4</math></b>     | $2.2 \pm 0.3$                       | <b><math>2.2 \pm 0.2</math></b> |
|                                  | 1.0                   |                                    |                                     | $2.0 \pm 0.2$                       | $2.1 \pm 0.3$                   |
|                                  | 1.2                   |                                    |                                     | $2.1 \pm 0.2$                       | $2.2 \pm 0.1$                   |
|                                  | 1.6                   |                                    |                                     | $2.4 \pm 0.3$                       | $2.5 \pm 0.2$                   |
| Lipid extract + SP-B, SP-C       | <b>0.4, 0.6</b>       | $1.6 \pm 0.2$                      | <b><math>2.5 \pm 0.6</math></b>     | $1.7 \pm 0.2$                       | <b><math>1.7 \pm 0.2</math></b> |
|                                  | 1.2, 1.2              |                                    |                                     | $2.0 \pm 0.3$                       | $2.1 \pm 0.2$                   |
|                                  | 1.2, 1.6              |                                    |                                     | $2.1 \pm 0.2$                       | $2.3 \pm 0.3$                   |
| Native surfactant                | NA                    | $1.3 \pm 0.1$                      | $1.6 \pm 0.2$                       | $1.2 \pm 0.1$                       | $1.3 \pm 0.1$                   |
| Organic extract                  | NA                    | $1.4 \pm 0.2$                      | $1.7 \pm 0.3$                       | $1.1 \pm 0.2$                       | $1.4 \pm 0.2$                   |
| Organic extract (reassembled)    | NA                    | $1.4 \pm 0.2$                      | $1.8 \pm 0.2$                       | $1.2 \pm 0.2$                       | $1.4 \pm 0.2$                   |

Protein concentration: % w/w total phospholipids (concentrations featured in Fig 5 in bold)

$\gamma_{\min \text{ QS1}}$ : minimum surface tension after 1 Quasi-static compression

$\Delta \gamma_{\text{QS1}}$ : change in surface tension from  $\gamma_{\min \text{ QS1}}$  after perturbation

$\gamma_{\min \text{ post}}$ : minimum surface tension (quasi-static compression) after full experimental protocol: 4 quasi-static + 20 dynamic cycles

$\Delta \gamma_{\text{post}}$ : change in surface tension from  $\gamma_{\min \text{ post}}$  after perturbation

## Supplementary Figure S1

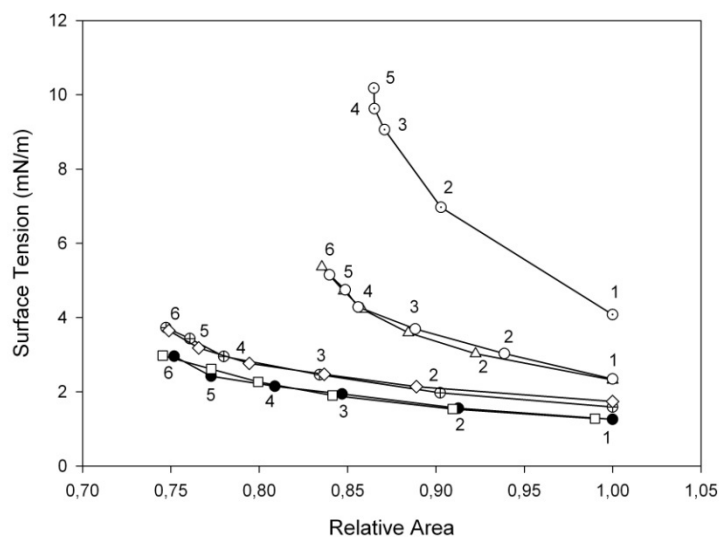

### Surface tension/area relationship for bubbles compressed to minimum surface tension and subjected to consecutive mechanical perturbations

Change in surface tension and area for 5-6 successive perturbations introduced with a pendulum hammer. Numbers indicate tension/area situation after the corresponding perturbation and symbols are as in figure 2. Curve shapes are representative for each sample (after repeating 4-6 independent experiments with qualitatively similar results). Pure lipid-coated bubbles showed a somehow more variable stability, and two different experiments have been included (open and dotted circles, respectively) showing extreme behaviors.
